# Supplementary material for: UiO66-NH2@In2O3 heterostructures for improved photocatalytic CO2 reduction
Source: Royal Society of Chemistry journal article supplement (doi:10.1039/d5ce00106d), 2025-01-01
Supplement: d5ce00106d1.pdf [file d5ce00106d1.pdf]

## Supplementary Materials

### UiO66-NH<sub>2</sub>@In<sub>2</sub>O<sub>3</sub> Heterostructures for Improved Photocatalytic CO<sub>2</sub> Reduction

Bolin Ma<sup>1,#</sup>, Guanghui Chen<sup>1,#</sup>, Lingling Zhou<sup>1</sup>, Chengyang Ni<sup>1</sup>, Xinyu Sun<sup>1</sup>, Lei Zhang<sup>1</sup>,  
Xinguo Xi<sup>1</sup>, Lanqin Tang<sup>1,2\*</sup>, Yong Zhou<sup>2\*</sup>

<sup>1</sup> Department of Chemistry and Chemical Engineering, Yancheng Institute of Technology, Yancheng, Jiangsu 224051, P. R. China

<sup>2</sup> School of Physics, Jiangsu Key Laboratory of Nanotechnology, Eco-materials and Renewable Energy Research Center (ERERC), National Laboratory of Solid State Microstructures, Collaborative Innovation Center of Advanced Microstructures, Nanjing University, Nanjing 210093, P. R. China

\*Corresponding authors: [lanqin\\_tang@163.com](mailto:lanqin_tang@163.com); [zhouyong1999@nju.edu.cn](mailto:zhouyong1999@nju.edu.cn)

# These authors contributed equally.

**Table S1.** A brief survey of CO<sub>2</sub> reduction performances of reported photocatalysts.

| Samples                                               | Sacrificial agent                                               | Products              | Productivity (μmol/g/h) | Ref.      |
|-------------------------------------------------------|-----------------------------------------------------------------|-----------------------|-------------------------|-----------|
| UiO66-NH <sub>2</sub> @In <sub>2</sub> O <sub>3</sub> | H <sub>2</sub> O                                                | CO                    | 69.30                   | This work |
| Ag/GaOOH/CaTiO <sub>3</sub>                           | H <sub>2</sub> O                                                | CO                    | 0.04                    | 1         |
| UiO66 with Defects                                    | H <sub>2</sub> O                                                | CO                    | 1.33                    | 2         |
| UiO68-NH <sub>2</sub> -ML100                          | TEOA                                                            | CO                    | 21.3                    | 3         |
| Ni-MOF (H <sub>2</sub> O)                             | Ru(bpy) <sub>3</sub> Cl <sub>2</sub> ·6H <sub>2</sub> O<br>TEOA | CO                    | 9610                    | 4         |
| Co-MOF/Cu <sub>2</sub> O                              | H <sub>2</sub> O                                                | CO                    | 3.83                    | 5         |
| PCN222-Cu@TpPa1                                       | H <sub>2</sub> O                                                | CO<br>CH <sub>4</sub> | 0.6<br>21.3             | 6         |
| PCN-224(Cu)/TiO <sub>2</sub>                          | H <sub>2</sub> O                                                | CO                    | 37.21                   | 7         |

1. H.X. Qiu, A. Yamamoto, H. Yoshida, *Sustainable Energy Fuels*, 2024,8, 1287-1294.
2. Y.Q. He, C.G. Li, X.B. Chen, Z. Shi, S.H. Feng, *ACS Appl. Mater. Interfaces* 2022, 14, 25, 28977–28984.
3. S.Q. Wang, X.Z. Wang, X.M. Cheng, J. Ma, W.Y. Sun, *J. Mater. Chem. A*, 2022, 10, 16396-16402.
4. K.N. Song, S.J. Liang, X.H. Zhong, M.Y. Wang, X.F. Mo, X.Q. Lei, Z. Lin, *Applied Catalysis B: Environmental*, 2022, 309,121232.
5. W.W. Dong, J. Jia, Y. Wang, J.R. An, O.Y. Yang, X.J. Gao, Y.L. Liu, J. Zhao, D.S. Li, *Chem. Eng. J.*, 438, 2022,135622.
6. Z.L. Wu, W. Li, L.L. Hou, Q.M. Wei, H.X. Yang, Y.Y. Jiang, D.Y. Tang, *Sep. Purif. Technol.*, 311, 2023, 123322.
7. L. Wang, P.X. Jin, J.W. Huang, H.D. She, Q.Z. Wang, *ACS Sustain. Chem. Eng.*, 18, 2019, 7, 15660-15670.

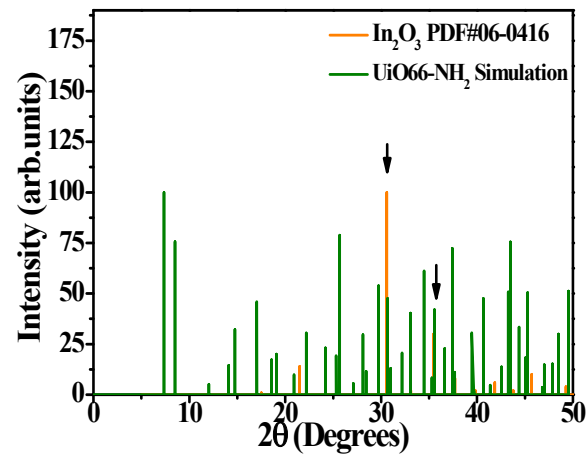

**Figure S1.** The standard XRD pattern of In<sub>2</sub>O<sub>3</sub> and UiO66-NH<sub>2</sub> shows that the main In<sub>2</sub>O<sub>3</sub> peaks around 30° and 35° overlap with the diffraction peaks of UiO66-NH<sub>2</sub>, making it difficult to distinguish the In<sub>2</sub>O<sub>3</sub> phase in the heterostructure.

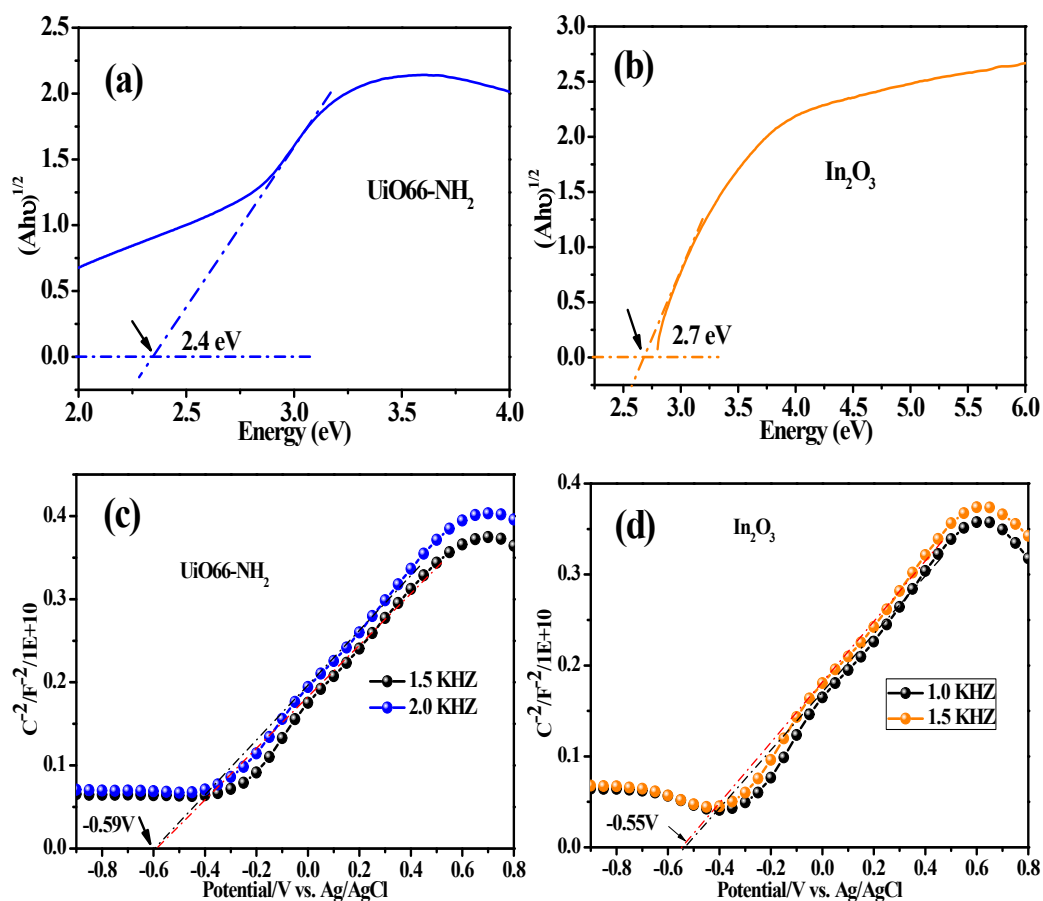

**Figure S2.** (a, b) The estimated band gap of UiO66-NH<sub>2</sub> and In<sub>2</sub>O<sub>3</sub> from Tauc plots. (c, d) Mott-Schottky curves of samples tested at 1000 Hz and 1500Hz in 0.5 mol L<sup>-1</sup> Na<sub>2</sub>SO<sub>4</sub> solution.

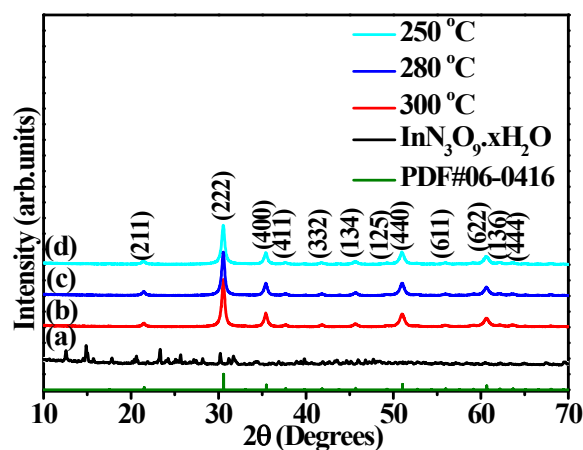

**Figure S3.** XRD patterns of  $\text{InN}_3\text{O}_9 \cdot x\text{H}_2\text{O}$  (a) and  $\text{InN}_3\text{O}_9 \cdot x\text{H}_2\text{O}$  calcined at 250 °C (b), 280 °C (c), and 300 °C (d). XRD analysis confirmed that calcination at 250 °C, 280 °C, and 300 °C for 4 hours consistently produced pure  $\text{In}_2\text{O}_3$ , as no diffraction peaks corresponding to indium nitrate were observed.

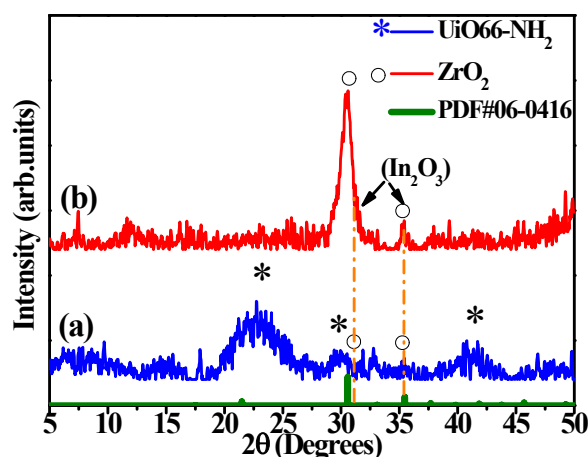

| Temperature (°C) | Products                                                                 |
|------------------|--------------------------------------------------------------------------|
| 250              | UiO66-NH <sub>2</sub> @In <sub>2</sub> O <sub>3</sub>                    |
| 300              | UiO66-NH <sub>2</sub> (ZrO <sub>2</sub> )/In <sub>2</sub> O <sub>3</sub> |
| 350              | ZrO <sub>2</sub> /In <sub>2</sub> O <sub>3</sub>                         |

**Figure S4.** XRD patterns of UiO66-NH<sub>2</sub>@In<sup>3+</sup> calcined at 300 °C (a) and 350 °C (b). Increasing the calcination temperature to 300 °C resulted in significantly weakened XRD diffraction peaks, though they remained assignable to UiO66-NH<sub>2</sub>, indicating partial structural collapse (**Figures S4a**). At 350 °C, the XRD peaks corresponding to UiO66-NH<sub>2</sub> disappeared entirely, and only ZrO<sub>2</sub> and In<sub>2</sub>O<sub>3</sub> diffraction peaks were observed, signaling complete framework decomposition. Specifically, the main diffraction peaks of In<sub>2</sub>O<sub>3</sub> overlap with the peaks of ZrO<sub>2</sub> at around 30° and 35° (2θ), which makes it difficult to distinguish the In<sub>2</sub>O<sub>3</sub> phase in the XRD pattern. The standard XRD pattern of In<sub>2</sub>O<sub>3</sub> is for reference (PDF#06-0416). To provide a clearer view of the phase conversion of UiO66-NH<sub>2</sub>@In<sup>3+</sup>, the bottom of Figure S4 provides a detailed description of the product transformation as the calcination temperature increases from 250°C to 350°C. Initially, the product is UiO66-NH<sub>2</sub>@In<sub>2</sub>O<sub>3</sub> (250°C), which gradually transitions into a partially collapsed structure, UiO66-NH<sub>2</sub>(ZrO<sub>2</sub>)/In<sub>2</sub>O<sub>3</sub> (300°C). Ultimately, the structure fully collapses, resulting in a ZrO<sub>2</sub>/In<sub>2</sub>O<sub>3</sub> composite (350°C).

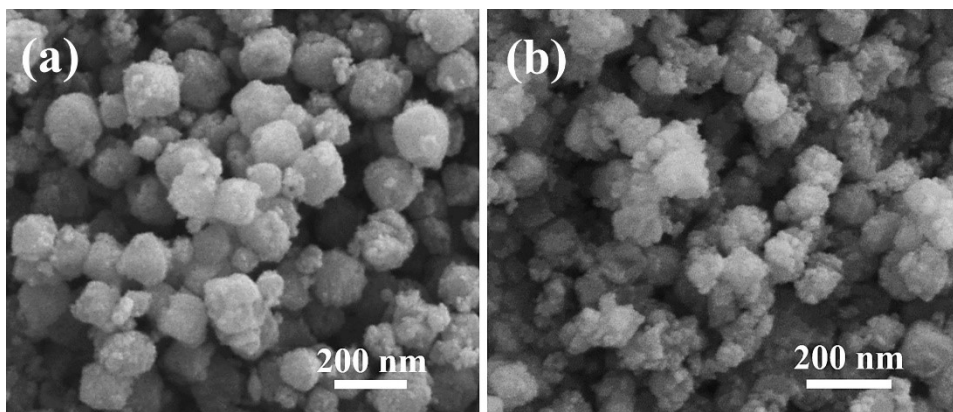

**Figure S5.** SEM images of UiO66-NH<sub>2</sub>@In<sup>3+</sup> calcined at 300 °C (a) and 350 °C (b). SEM analysis revealed that samples calcined at 300 °C exhibited partially collapsed structures with traces of octahedral morphology and the emergence of numerous nanoparticles (**Figures S5a**). At 350 °C, the structure collapsed entirely, leaving only aggregated nanoparticles (**Figures S5b**).

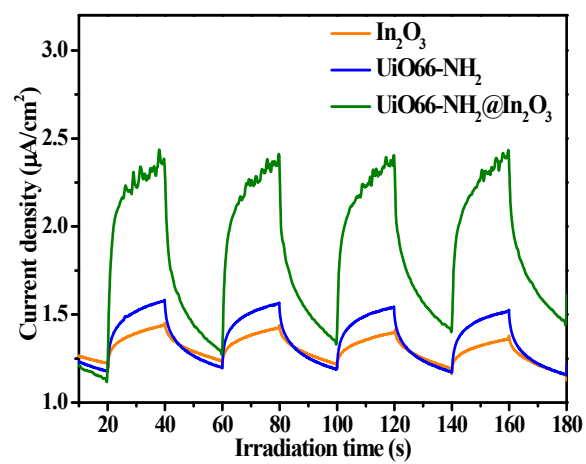

**Figure S6.** Photoelectrochemical measurements of  $\text{UiO66-NH}_2$ ,  $\text{In}_2\text{O}_3$ , and  $\text{UiO66-NH}_2@\text{In}_2\text{O}_3$  confirm enhanced photocatalytic activity, as evidenced by the significantly higher photocurrent observed for  $\text{UiO66-NH}_2@\text{In}_2\text{O}_3$ .
